# Supplementary material
Source: PubMed Central journal article supplement (PMC337030)

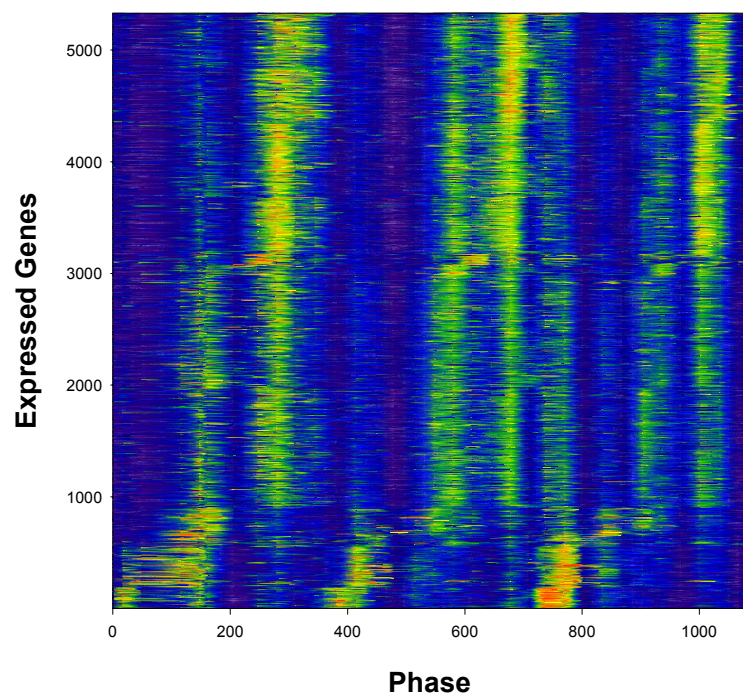

Supplement: pnas_0306490101_2.pdf [file pnas_0306490101_2.pdf]

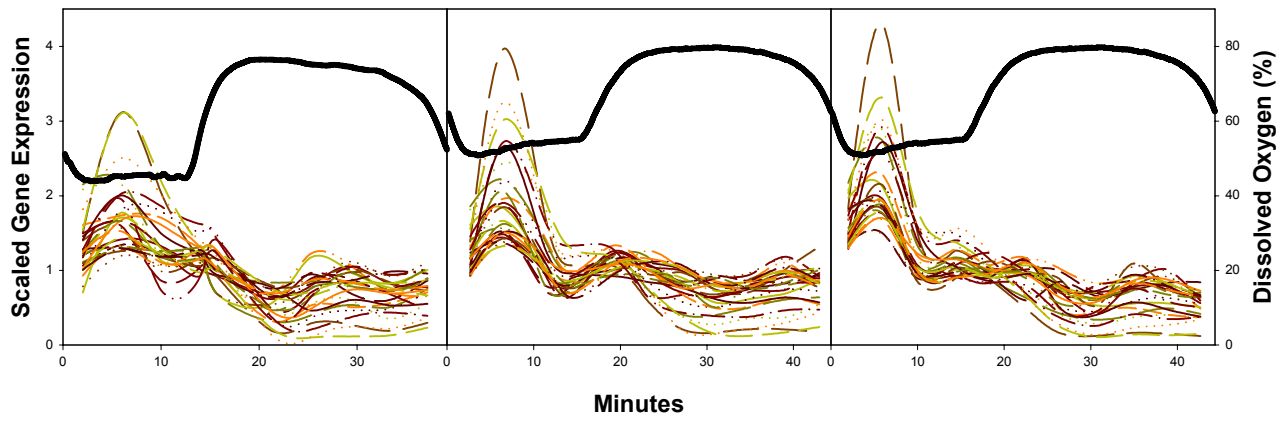

Supplement: pnas_0306490101_5.pdf [file pnas_0306490101_5.pdf]
